# Supplementary material for: A Wild Allele of Pyrroline-5-Carboxylate Synthase1 Leads to Proline Accumulation in Spikes and Leaves of Barley Contributing to Improved Performance Under Reduced Water Availability
Source: PubMed Central journal article supplement (PMC7947243; doi:10.3389/fpls.2021.633448), 2021-02-25
Supplement: Data_Sheet_2.pdf [file Data_Sheet_2.pdf]

Three way ANOVA

Sources of variation = treatment:genotype:year

```
*****  
*****  
*****  
*****
```

1. %Relative leaf water content

Shapiro-Wilk normality test

data: resRWC

W = 0.99582, p-value = 0.8398

summary(anovaRWC)

|                         | Df  | Sum Sq | Mean Sq | F value | Pr(>F)   |     |
|-------------------------|-----|--------|---------|---------|----------|-----|
| treatment               | 1   | 33696  | 33696   | 1088.91 | < 2e-16  | *** |
| genotype                | 4   | 20656  | 5164    | 166.88  | < 2e-16  | *** |
| year                    | 1   | 5527   | 5527    | 178.59  | < 2e-16  | *** |
| treatment:genotype      | 4   | 24349  | 6087    | 196.71  | < 2e-16  | *** |
| treatment:year          | 1   | 3114   | 3114    | 100.64  | < 2e-16  | *** |
| genotype:year           | 4   | 2078   | 519     | 16.79   | 8.44e-12 | *** |
| treatment:genotype:year | 4   | 1310   | 327     | 10.58   | 9.24e-08 | *** |
| Residuals               | 190 | 5880   | 31      |         |          |     |

---

Signif. codes: 0 '\*\*\*' 0.001 '\*\*' 0.01 '\*' 0.05 '.' 0.1 ' ' 1

> print(model.tables(anovaRWC,"means"),digits=3)

Tables of means

Grand mean

72.82724

treatment

treatment

control drought

85.5 60.2

genotype

genotype

Barke HOR10151 S42IL-141 S42IL-143 Scarlett

61.8 60.9 81.0 85.3 75.0

year

year

2018 2019

80.9 69.6

treatment:genotype

genotype

treatment Barke HOR10151 S42IL-141 S42IL-143 Scarlett

control 88.0 85.1 84.5 85.0 84.8

drought 35.5 36.8 77.5 85.7 65.3

```

treatment:year
  year
treatment 2018 2019
  control 87.5 84.7
  drought 74.4 54.5

```

```

genotype:year
  year
genotype 2018 2019
  Barke 72.9 57.3
  HOR10151 71.8 56.6
  S42IL-141 86.3 78.9
  S42IL-143 85.1 85.4
  Scarlett 88.6 69.6

```

```

treatment:genotype:year
, , year = 2018

```

```

      genotype
treatment Barke HOR10151 S42IL-141 S42IL-143 Scarlett
  control 89.4 86.4 85.3 85.6 91.0
  drought 56.5 57.2 87.4 84.6 86.1

```

```

, , year = 2019

```

```

      genotype
treatment Barke HOR10151 S42IL-141 S42IL-143 Scarlett
  control 87.5 84.6 84.2 84.7 82.4
  drought 27.1 28.6 73.6 86.2 56.9

```

```

*****
*****

```

## 2. Length of the Main Spike

Shapiro-Wilk normality test

```

data: resspikelength
W = 0.98852, p-value = 0.09021

```

```

summary(anovaspikelength)

```

|                         | Df  | Sum Sq | Mean Sq | F value | Pr(>F)   |     |
|-------------------------|-----|--------|---------|---------|----------|-----|
| treatment               | 1   | 234.7  | 234.69  | 275.384 | < 2e-16  | *** |
| genotype                | 4   | 846.9  | 211.73  | 248.448 | < 2e-16  | *** |
| year                    | 1   | 23.0   | 22.96   | 26.946  | 5.35e-07 | *** |
| treatment:genotype      | 4   | 15.0   | 3.75    | 4.399   | 0.00201  | **  |
| treatment:year          | 1   | 0.7    | 0.74    | 0.867   | 0.35286  |     |
| genotype:year           | 4   | 2.9    | 0.74    | 0.863   | 0.48750  |     |
| treatment:genotype:year | 4   | 5.4    | 1.36    | 1.593   | 0.17782  |     |
| Residuals               | 190 | 161.9  | 0.85    |         |          |     |

---

Signif. codes: 0 '\*\*\*' 0.001 '\*\*' 0.01 '\*' 0.05 '.' 0.1 ' ' 1

```
> print(model.tables(anovaspikelength,"means"),digits=3)
```

Tables of means

Grand mean

9.12381

treatment

treatment

control drought

|       |      |
|-------|------|
| 10.18 | 8.07 |
|-------|------|

genotype

genotype

| Barke | HOR10151 | S42IL-141 | S42IL-143 | Scarlett |
|-------|----------|-----------|-----------|----------|
| 8.90  | 5.34     | 10.93     | 10.48     | 9.96     |

year

year

2018 2019

|      |      |
|------|------|
| 9.65 | 8.91 |
|------|------|

treatment:genotype

genotype

| treatment | Barke | HOR10151 | S42IL-141 | S42IL-143 | Scarlett |
|-----------|-------|----------|-----------|-----------|----------|
| control   | 10.26 | 6.43     | 11.55     | 11.40     | 11.26    |
| drought   | 7.55  | 4.25     | 10.30     | 9.56      | 8.67     |

treatment:year

year

| treatment | 2018  | 2019  |
|-----------|-------|-------|
| control   | 10.61 | 10.01 |
| drought   | 8.68  | 7.82  |

genotype:year

year

| genotype  | 2018  | 2019  |
|-----------|-------|-------|
| Barke     | 9.50  | 8.67  |
| HOR10151  | 5.55  | 5.26  |
| S42IL-141 | 11.70 | 10.62 |
| S42IL-143 | 11.07 | 10.25 |
| Scarlett  | 10.42 | 9.78  |

treatment:genotype:year

, , year = 2018

genotype

| treatment | Barke | HOR10151 | S42IL-141 | S42IL-143 | Scarlett |
|-----------|-------|----------|-----------|-----------|----------|
| control   | 10.75 | 6.22     | 12.67     | 11.75     | 11.67    |
| drought   | 8.25  | 4.88     | 10.73     | 10.38     | 9.17     |

, , year = 2019

```

      genotype
treatment Barke HOR10151 S42IL-141 S42IL-143 Scarlett
  control 10.07  6.51    11.10    11.27    11.10
  drought  7.27  4.00    10.13     9.23     8.47
*****
*****

```

3. Wilting Score  
Shapiro-Wilk normality test

```

data: resWS
W = 0.99198, p-value = 0.3041

```

```

summary(anovaWS)

```

|                         | Df  | Sum Sq | Mean Sq | F value  | Pr(>F)   |     |
|-------------------------|-----|--------|---------|----------|----------|-----|
| treatment               | 1   | 477.9  | 477.9   | 2683.797 | < 2e-16  | *** |
| genotype                | 4   | 122.9  | 30.7    | 172.549  | < 2e-16  | *** |
| year                    | 1   | 0.1    | 0.1     | 0.782    | 0.37767  |     |
| treatment:genotype      | 4   | 114.0  | 28.5    | 160.014  | < 2e-16  | *** |
| treatment:year          | 1   | 8.8    | 8.8     | 49.388   | 3.66e-11 | *** |
| genotype:year           | 4   | 2.3    | 0.6     | 3.171    | 0.01499  | *   |
| treatment:genotype:year | 4   | 2.5    | 0.6     | 3.565    | 0.00788  | **  |
| Residuals               | 190 | 33.8   | 0.2     |          |          |     |

```

---
Signif. codes:  0 '***' 0.001 '**' 0.01 '*' 0.05 '.' 0.1
' ' 1

```

```

> print(model.tables(anovaWS,"means"),digits=3)
Tables of means
Grand mean

```

1.705714

```

treatment
treatment
control drought
  0.20    3.21

```

```

genotype
genotype
  Barke  HOR10151  S42IL-141  S42IL-143  Scarlett
  2.214    2.883    1.050    0.790    1.590

```

```

year
year
2018 2019
1.665 1.722

```

```

treatment:genotype
genotype
treatment Barke HOR10151 S42IL-141 S42IL-143 Scarlett
  control 0.24  0.22    0.20    0.13    0.20
  drought 4.19  5.55    1.90    1.45    2.98

```

```

treatment:year
  year
treatment 2018 2019
  control 0.48 0.08
  drought 2.85 3.36

```

```

genotype:year
  year
genotype 2018 2019
  Barke 1.917 2.333
  HOR10151 2.733 2.943
  S42IL-141 1.217 0.983
  S42IL-143 0.808 0.783
  Scarlett 1.650 1.567

```

```

treatment:genotype:year
, , year = 2018

```

```

      genotype
treatment Barke HOR10151 S42IL-141 S42IL-143 Scarlett
  control 0.50 0.55 0.52 0.45 0.38
  drought 3.33 4.92 1.92 1.17 2.92

```

```

, , year = 2019

```

```

      genotype
treatment Barke HOR10151 S42IL-141 S42IL-143 Scarlett
  control 0.13 0.09 0.07 0.00 0.13
  drought 4.53 5.80 1.90 1.57 3.00

```

```

*****
*****

```

#### 4. Grain weight/plant

Shapiro-Wilk normality test

```

data: resGrain_DW
W = 0.98853, p-value = 0.09076

```

```
summary(anovaGrain_DW)
```

|                         | Df  | Sum Sq | Mean Sq | F value  | Pr(>F)      |
|-------------------------|-----|--------|---------|----------|-------------|
| treatment               | 1   | 4751   | 4751    | 2205.606 | < 2e-16 *** |
| genotype                | 4   | 415    | 104     | 48.179   | < 2e-16 *** |
| year                    | 1   | 1      | 1       | 0.418    | 0.51891     |
| treatment:genotype      | 4   | 266    | 67      | 30.885   | < 2e-16 *** |
| treatment:year          | 1   | 15     | 15      | 6.979    | 0.00894 **  |
| genotype:year           | 4   | 12     | 3       | 1.430    | 0.22563     |
| treatment:genotype:year | 4   | 18     | 5       | 2.120    | 0.07984 .   |
| Residuals               | 190 | 409    | 2       |          |             |

```
---
```

```

Signif. codes:  0 '***' 0.001 '**' 0.01 '*' 0.05 '.' 0.1
' ' 1

```

```
> print(model.tables(anovaGrain_DW,"means"),digits=3)
```

```
Tables of means
```

```
Grand mean
```

```
8.135014
```

```
treatment
```

```
treatment
```

```
control drought
```

```
12.89 3.38
```

```
genotype
```

```
genotype
```

```
Barke HOR10151 S42IL-141 S42IL-143 Scarlett
```

```
7.32 6.00 8.99 10.11 8.26
```

```
year
```

```
year
```

```
2018 2019
```

```
8.24 8.09
```

```
treatment:genotype
```

```
genotype
```

```
treatment Barke HOR10151 S42IL-141 S42IL-143 Scarlett
```

```
control 13.91 10.40 12.95 13.53 13.67
```

```
drought 0.73 1.59 5.03 6.69 2.85
```

```
treatment:year
```

```
year
```

```
treatment 2018 2019
```

```
control 12.57 13.02
```

```
drought 3.90 3.17
```

```
genotype:year
```

```
year
```

```
genotype 2018 2019
```

```
Barke 7.54 7.23
```

```
HOR10151 6.32 5.87
```

```
S42IL-141 8.33 9.25
```

```
S42IL-143 10.38 10.00
```

```
Scarlett 8.62 8.12
```

```
treatment:genotype:year
```

```
, , year = 2018
```

```
genotype
```

```
treatment Barke HOR10151 S42IL-141 S42IL-143 Scarlett
```

```
control 13.68 9.83 11.33 14.01 14.01
```

```
drought 1.41 2.81 5.33 6.74 3.23
```

```
, , year = 2019
```

```
genotype
```

```
treatment Barke HOR10151 S42IL-141 S42IL-143 Scarlett
```

```

control 14.00 10.63    13.59    13.34    13.54
drought  0.46  1.10     4.90     6.67     2.70
*****
*****

```

5. Plant height  
Shapiro-Wilk normality test

```

data: resplant_height
W = 0.99101, p-value = 0.2189
summary(anovaplant_height)

```

|                         | Df  | Sum Sq | Mean Sq | F value | Pr(>F)   |     |
|-------------------------|-----|--------|---------|---------|----------|-----|
| treatment               | 1   | 27915  | 27915   | 892.913 | < 2e-16  | *** |
| genotype                | 4   | 767    | 192     | 6.133   | 0.000116 | *** |
| year                    | 1   | 640    | 640     | 20.476  | 1.06e-05 | *** |
| treatment:genotype      | 4   | 239    | 60      | 1.909   | 0.110498 |     |
| treatment:year          | 1   | 769    | 769     | 24.605  | 1.56e-06 | *** |
| genotype:year           | 4   | 124    | 31      | 0.989   | 0.414495 |     |
| treatment:genotype:year | 4   | 301    | 75      | 2.407   | 0.050976 | .   |
| Residuals               | 190 | 5940   | 31      |         |          |     |

```

---
Signif. codes:  0 '***' 0.001 '**' 0.01 '*' 0.05 '.' 0.1
' ' 1

```

```
> print(model.tables(anovaplant_height, "means"), digits=3)
```

Tables of means

Grand mean

81.6361

```

treatment
treatment
control drought
  93.2    70.1

```

```

genotype
genotype
  Barke  HOR10151  S42IL-141  S42IL-143  Scarlett
  84.0    81.9    80.0    83.3    79.0

```

```

year
year
2018 2019
84.4 80.5

```

```

treatment:genotype
  genotype
treatment Barke  HOR10151  S42IL-141  S42IL-143  Scarlett
  control  94.7   94.9    90.1    94.6    91.5
  drought  73.3   68.9    69.8    72.1    66.5

```

```

treatment:year
  year
treatment 2018 2019
  control  92.9 93.3

```

```

drought 75.9 67.8

genotype:year
  year
genotype 2018 2019
  Barke 84.6 83.8
  HOR10151 84.7 80.8
  S42IL-141 83.3 78.6
  S42IL-143 86.2 82.2
  Scarlett 83.3 77.3

treatment:genotype:year
, , year = 2018

      genotype
treatment Barke HOR10151 S42IL-141 S42IL-143 Scarlett
  control 92.3 96.5 88.0 96.7 91.0
  drought 76.8 72.8 78.6 75.7 75.5

, , year = 2019

      genotype
treatment Barke HOR10151 S42IL-141 S42IL-143 Scarlett
  control 95.7 94.3 91.0 93.7 91.7
  drought 71.9 67.4 66.2 70.6 62.9
*****
*****
6. Grain number per main spike
Shapiro-Wilk normality test

data: resgrainnumber_mainspike
W = 0.98342, p-value = 0.51436

summary(anovagrainnumber_mainspike)
      Df Sum Sq Mean Sq F value Pr(>F)
treatment 1 11470 11470 432.871 < 2e-16 ***
genotype 4 3316 829 31.282 < 2e-16 ***
year 1 122 122 4.601 0.0332 *
treatment:genotype 4 5208 1302 49.134 < 2e-16 ***
treatment:year 1 1186 1186 44.750 2.44e-10 ***
genotype:year 4 159 40 1.498 0.2045
treatment:genotype:year 4 1073 268 10.125 1.89e-07 ***
Residuals 190 5035 26
---
Signif. codes: 0 '***' 0.001 '**' 0.01 '*' 0.05 '.' 0.1
' ' 1
> print(model.tables(anovagrainnumber_mainspike,"means"),digits=3)
Tables of means
Grand mean

20.42857

treatment
treatment

```



control drought  
27.82 13.04

genotype  
genotype

|       |          |           |           |          |
|-------|----------|-----------|-----------|----------|
| Barke | HOR10151 | S42IL-141 | S42IL-143 | Scarlett |
| 13.10 | 23.24    | 23.79     | 22.64     | 19.38    |

year  
year  
2018 2019  
21.63 19.95

treatment:genotype  
genotype  
treatment Barke HOR10151 S42IL-141 S42IL-143 Scarlett  
control 22.7 38.7 25.0 26.0 26.7  
drought 3.5 7.8 22.6 19.3 12.0

treatment:year  
year  
treatment 2018 2019  
control 25.27 28.84  
drought 18.00 11.05

genotype:year  
year  
genotype 2018 2019  
Barke 13.42 12.97  
HOR10151 22.33 23.60  
S42IL-141 25.08 23.27  
S42IL-143 25.25 21.60  
Scarlett 22.08 18.30

treatment:genotype:year  
, , year = 2018

genotype  
treatment Barke HOR10151 S42IL-141 S42IL-143 Scarlett  
control 20.5 27.3 26.5 26.3 25.7  
drought 6.3 17.3 23.7 24.2 18.5

, , year = 2019

genotype  
treatment Barke HOR10151 S42IL-141 S42IL-143 Scarlett  
control 23.6 43.2 24.4 25.9 27.1  
drought 2.3 4.0 22.1 17.3 9.5

\*\*\*\*\*  
\*\*\*\*\*

7. Tiller number  
Shapiro-Wilk normality test

```
data: restiller_number
W = 0.98711, p-value = 0.05402
```

```
summary(anovatiller_number)
```

|                         | Df  | Sum Sq | Mean Sq | F value  | Pr(>F)   |     |
|-------------------------|-----|--------|---------|----------|----------|-----|
| treatment               | 1   | 3497   | 3497    | 1200.472 | < 2e-16  | *** |
| genotype                | 4   | 195    | 49      | 16.732   | 9.13e-12 | *** |
| year                    | 1   | 19     | 19      | 6.408    | 0.01217  | *   |
| treatment:genotype      | 4   | 104    | 26      | 8.894    | 1.33e-06 | *** |
| treatment:year          | 1   | 450    | 450     | 154.427  | < 2e-16  | *** |
| genotype:year           | 4   | 56     | 14      | 4.809    | 0.00102  | **  |
| treatment:genotype:year | 4   | 74     | 19      | 6.354    | 8.07e-05 | *** |
| Residuals               | 190 | 554    | 3       |          |          |     |

```
---
```

```
Signif. codes:  0 '***' 0.001 '**' 0.01 '*' 0.05 '.' 0.1 ' ' 1
```

```
> print(model.tables(anovatiller_number, "means"), digits=3)
```

```
Tables of means
```

```
Grand mean
```

```
16.20476
```

```
treatment
```

```
treatment
```

```
control drought
```

```
20.29 12.12
```

```
genotype
```

```
genotype
```

```
Barke HOR10151 S42IL-141 S42IL-143 Scarlett
```

```
16.14 14.88 16.64 17.74 15.62
```

```
year
```

```
year
```

```
2018 2019
```

```
15.73 16.39
```

```
treatment:genotype
```

```
genotype
```

```
treatment Barke HOR10151 S42IL-141 S42IL-143 Scarlett
```

```
control 20.95 19.48 20.05 20.81 20.14
```

```
drought 11.33 10.29 13.24 14.67 11.10
```

```
treatment:year
```

```
year
```

```
treatment 2018 2019
```

```
control 17.50 21.40
```

```
drought 13.97 11.39
```

```
genotype:year
```

```
year
```

```
genotype 2018 2019
```

```
Barke 16.67 15.93
```

```
HOR10151 15.08 14.80
```

```
S42IL-141 15.92 16.93
S42IL-143 15.92 18.47
Scarlett 15.08 15.83
```

```
treatment:genotype:year
, , year = 2018
```

```
      genotype
treatment Barke HOR10151 S42IL-141 S42IL-143 Scarlett
control 18.83 16.17 17.17 18.33 17.00
drought 14.50 14.00 14.67 13.50 13.17
```

```
, , year = 2019
```

```
      genotype
treatment Barke HOR10151 S42IL-141 S42IL-143 Scarlett
control 21.80 20.80 21.20 21.80 21.40
drought 10.07 8.80 12.67 15.13 10.27
```

```
*****
*****
```

8. Fresh weight  
Shapiro-Wilk normality test

```
data: resfreshwght
W = 0.98965, p-value = 0.7246
```

```
summary(anovafreshwght)
```

|                         | Df  | Sum Sq | Mean Sq | F value | Pr(>F)       |
|-------------------------|-----|--------|---------|---------|--------------|
| treatment               | 1   | 11970  | 11970   | 118.466 | < 2e-16 ***  |
| genotype                | 4   | 17116  | 4279    | 42.350  | < 2e-16 ***  |
| year                    | 1   | 26198  | 26198   | 259.282 | < 2e-16 ***  |
| treatment:genotype      | 4   | 8053   | 2013    | 19.925  | 1.03e-13 *** |
| treatment:year          | 1   | 104    | 104     | 1.032   | 0.31094      |
| genotype:year           | 4   | 3460   | 865     | 8.561   | 2.26e-06 *** |
| treatment:genotype:year | 4   | 1482   | 371     | 3.667   | 0.00667 **   |
| Residuals               | 190 | 19197  | 101     |         |              |

```
---
Signif. codes:  0 '***' 0.001 '**' 0.01 '*' 0.05 '.' 0.1
' ' 1
```

```
> print(model.tables(anovafreshwght,"means"),digits=3)
```

```
Tables of means
Grand mean
```

```
34.91013
```

```
treatment
treatment
control drought
42.5 27.4
```

```
genotype
genotype
Barke HOR10151 S42IL-141 S42IL-143 Scarlett
```

48.5 21.5 39.5 30.3 34.8

year  
year  
2018 2019  
52.6 27.8

treatment:genotype  
genotype  
treatment Barke HOR10151 S42IL-141 S42IL-143 Scarlett  
control 64.8 25.0 53.3 31.7 37.5  
drought 32.3 17.9 25.7 28.9 32.0

treatment:year  
year  
treatment 2018 2019  
control 59.0 35.8  
drought 46.1 19.9

genotype:year  
year  
genotype 2018 2019  
Barke 69.6 40.1  
HOR10151 29.3 18.3  
S42IL-141 52.4 34.3  
S42IL-143 51.0 22.0  
Scarlett 60.6 24.5

treatment:genotype:year  
, , year = 2018

genotype  
treatment Barke HOR10151 S42IL-141 S42IL-143 Scarlett  
control 80.1 28.6 62.8 56.8 66.8  
drought 59.1 30.0 42.0 45.2 54.3

, , year = 2019

genotype  
treatment Barke HOR10151 S42IL-141 S42IL-143 Scarlett  
control 58.7 23.6 49.5 21.7 25.8  
drought 21.5 13.1 19.2 22.4 23.1

\*\*\*\*\*  
\*\*\*\*\*

9. SPike Number  
Shapiro-Wilk normality test

data: resspikenumber  
W = 0.98547, p-value = 0.5103

summary(anovaspikenumber)  
Df Sum Sq Mean Sq F value Pr(>F)

```

treatment          1   4781   4781 2133.861 < 2e-16 ***
genotype           4    146    37   16.296 1.71e-11 ***
year               1   2228   2228 994.360 < 2e-16 ***
treatment:genotype 4    154    39   17.187 4.76e-12 ***
treatment:year     1     29    29   12.967 0.000405 ***
genotype:year      4    136    34   15.154 9.03e-11 ***
treatment:genotype:year 4     29     7    3.254 0.013084 *
Residuals         190   426     2

```

---

Signif. codes: 0 '\*\*\*' 0.001 '\*\*' 0.01 '\*' 0.05 '.' 0.1 ' ' 1

```
> print(model.tables(anovaspikenummer, "means"), digits=3)
```

Tables of means

Grand mean

19.33333

```

treatment
treatment
control drought
  24.10  14.56

```

```

genotype
genotype
  Barke  HOR10151  S42IL-141  S42IL-143  Scarlett
  18.86   18.64   19.38   20.93   18.86

```

```

year
year
2018 2019
14.18 21.39

```

```

treatment:genotype
  genotype
treatment Barke HOR10151 S42IL-141 S42IL-143 Scarlett
control 24.52 24.24 23.52 24.38 23.86
drought 13.19 13.05 15.24 17.48 13.86

```

```

treatment:year
  year
treatment 2018 2019
control 18.37 26.40
drought 10.00 16.39

```

```

genotype:year
  year
genotype 2018 2019
Barke 13.67 20.93
HOR10151 15.75 19.80
S42IL-141 13.00 21.93
S42IL-143 14.58 23.47
Scarlett 13.92 20.83

```

```
treatment:genotype:year
```

, , year = 2018

|           | genotype |          |           |           |          |
|-----------|----------|----------|-----------|-----------|----------|
| treatment | Barke    | HOR10151 | S42IL-141 | S42IL-143 | Scarlett |
| control   | 18.83    | 20.33    | 16.83     | 18.33     | 17.50    |
| drought   | 8.50     | 11.17    | 9.17      | 10.83     | 10.33    |

, , year = 2019

|           | genotype |          |           |           |          |
|-----------|----------|----------|-----------|-----------|----------|
| treatment | Barke    | HOR10151 | S42IL-141 | S42IL-143 | Scarlett |
| control   | 26.80    | 25.80    | 26.20     | 26.80     | 26.40    |
| drought   | 15.07    | 13.80    | 17.67     | 20.13     | 15.27    |

```
*****
*****
Gas exchange, 15 days after stress
*****
*****
```

10. Transpiration rate (E)

Shapiro-Wilk normality test

data: resE  
W = 0.98116, p-value = 0.7441

summary(anovaE)

|                         | Df  | Sum Sq    | Mean Sq   | F value | Pr(>F)   |     |
|-------------------------|-----|-----------|-----------|---------|----------|-----|
| treatment               | 1   | 0.0003816 | 0.0003816 | 1892.22 | < 2e-16  | *** |
| genotype                | 4   | 0.0000348 | 0.0000087 | 43.09   | < 2e-16  | *** |
| year                    | 1   | 0.0004534 | 0.0004534 | 2248.09 | < 2e-16  | *** |
| treatment:genotype      | 4   | 0.0000319 | 0.0000080 | 39.51   | < 2e-16  | *** |
| treatment:year          | 1   | 0.0001519 | 0.0001519 | 753.33  | < 2e-16  | *** |
| genotype:year           | 4   | 0.0000139 | 0.0000035 | 17.23   | 4.48e-12 | *** |
| treatment:genotype:year | 4   | 0.0000127 | 0.0000032 | 15.74   | 3.85e-11 | *** |
| Residuals               | 190 | 0.0000383 | 0.0000002 |         |          |     |

```
---
Signif. codes:  0 '***' 0.001 '**' 0.01 '*' 0.05 '.' 0.1
' ' 1
```

> print(model.tables(anovaE,"means"),digits=3)

Tables of means

Grand mean

0.002329967

| treatment |         |
|-----------|---------|
| treatment |         |
| control   | drought |
| 0.00368   | 0.00098 |

| genotype |          |          |           |           |          |
|----------|----------|----------|-----------|-----------|----------|
| genotype | Barke    | HOR10151 | S42IL-141 | S42IL-143 | Scarlett |
|          | 0.001974 | 0.001956 | 0.003039  | 0.002510  | 0.002170 |

```

year
year
  2018    2019
0.00001 0.00326

```

```

treatment:genotype
  genotype
treatment Barke    HOR10151 S42IL-141 S42IL-143 Scarlett
  control  0.00351 0.00354  0.00470   0.00310   0.00354
  drought  0.00044 0.00037  0.00138   0.00192   0.00080

```

```

treatment:year
  year
treatment 2018    2019
  control  0.00001 0.00515
  drought  0.00000 0.00137

```

```

genotype:year
  year
genotype  2018    2019
  Barke    0.00001 0.00276
  HOR10151 0.00001 0.00274
  S42IL-141 0.00001 0.00425
  S42IL-143 0.00001 0.00351
  Scarlett  0.00001 0.00303

```

```

treatment:genotype:year
, , year = 2018
      genotype
treatment Barke    HOR10151 S42IL-141 S42IL-143 Scarlett
  control  0.00001 0.00001  0.00001   0.00001   0.00001
  drought  0.00000 0.00000  0.00000   0.00001   0.00000

```

```

, , year = 2019
      genotype
treatment Barke    HOR10151 S42IL-141 S42IL-143 Scarlett
  control  0.00491 0.00496  0.00658   0.00434   0.00495
  drought  0.00062 0.00052  0.00193   0.00268   0.00112

```

```

*****
*****
*****

```

11. Net Co2 Assimilation rate (A)  
Shapiro-Wilk normality test

```

data: resA
W = 0.97315, p-value = 0.7177

```

```

summary(anovaA)
              Df Sum Sq Mean Sq F value    Pr(>F)
treatment    1  10794   10794  5160.57 < 2e-16 ***

```

```

genotype          4      813      203   97.13 < 2e-16 ***
year              1     2341     2341 1118.99 < 2e-16 ***
treatment:genotype 4      797      199   95.23 < 2e-16 ***
treatment:year     1       39       39   18.62 2.57e-05 ***
genotype:year      4      185       46   22.15 5.05e-15 ***
treatment:genotype:year 4      54       13    6.44 7.01e-05 ***
Residuals         190     397       2

```

---

Signif. codes: 0 '\*\*\*' 0.001 '\*\*' 0.01 '\*' 0.05 '.' 0.1 ' ' 1

```
> print(model.tables(anovaA,"means"),digits=3)
```

Tables of means

Grand mean

15.69796

treatment

treatment

control drought

22.87 8.53

genotype

genotype

|  | Barke | HOR10151 | S42IL-141 | S42IL-143 | Scarlett |
|--|-------|----------|-----------|-----------|----------|
|  | 15.33 | 13.63    | 16.83     | 18.88     | 13.82    |

year

year

2018 2019

20.98 13.59

treatment:genotype

genotype

treatment Barke HOR10151 S42IL-141 S42IL-143 Scarlett

control 24.82 22.34 22.68 23.01 21.49

drought 5.85 4.92 10.97 14.75 6.15

treatment:year

year

treatment 2018 2019

control 28.83 20.48

drought 13.13 6.69

genotype:year

year

genotype 2018 2019

Barke 22.47 12.48

HOR10151 18.69 11.61

S42IL-141 19.70 15.68

S42IL-143 25.40 16.27

Scarlett 18.62 11.89

treatment:genotype:year

, , year = 2018



```

          genotype
treatment Barke HOR10151 S42IL-141 S42IL-143 Scarlett
  control 32.3  27.8      27.6      30.5      26.0
  drought 12.7   9.6      11.8      20.3      11.3

```

, , year = 2019

```

          genotype
treatment Barke HOR10151 S42IL-141 S42IL-143 Scarlett
  control 21.8  20.2      20.7      20.0      19.7
  drought  3.1   3.1      10.6      12.5      4.1

```

```

*****
*****
*****

```

## 12. Intracellular Co2 (Ci)

Shapiro-Wilk normality test

data: resCi

W = 0.98927, p-value = 0.81943

summary(anovaCi)

|                         | Df  | Sum Sq | Mean Sq | F value | Pr(>F)       |
|-------------------------|-----|--------|---------|---------|--------------|
| treatment               | 1   | 75826  | 75826   | 374.96  | < 2e-16 ***  |
| genotype                | 4   | 20391  | 5098    | 25.21   | < 2e-16 ***  |
| year                    | 1   | 3694   | 3694    | 18.27   | 3.03e-05 *** |
| treatment:genotype      | 4   | 32764  | 8191    | 40.50   | < 2e-16 ***  |
| treatment:year          | 1   | 45051  | 45051   | 222.77  | < 2e-16 ***  |
| genotype:year           | 4   | 24991  | 6248    | 30.89   | < 2e-16 ***  |
| treatment:genotype:year | 4   | 26930  | 6733    | 33.29   | < 2e-16 ***  |
| Residuals               | 190 | 38423  | 202     |         |              |

---

Signif. codes: 0 '\*\*\*' 0.001 '\*\*' 0.01 '\*' 0.05 '.' 0.1 ' ' 1

> print(model.tables(anovaCi, "means"), digits=3)

Tables of means

Grand mean

225.3296

```

treatment
treatment
control drought
  244.3  206.3

```

```

genotype
genotype
  Barke  HOR10151  S42IL-141  S42IL-143  Scarlett
  221.1    217.9    238.0    213.6    236.0

```

year

year

2018 2019  
218.7 228.0

```
treatment:genotype
  genotype
treatment Barke HOR10151 S42IL-141 S42IL-143 Scarlett
  control 242.0 244.6 275.2 217.3 242.7
  drought 200.2 191.2 200.9 210.0 229.4
```

```
treatment:year
  year
treatment 2018 2019
  control 260.9 237.7
  drought 176.5 218.2
```

```
genotype:year
  year
genotype 2018 2019
  Barke 214.9 223.6
  HOR10151 232.0 212.2
  S42IL-141 229.8 241.3
  S42IL-143 217.9 211.9
  Scarlett 198.8 250.9
```

```
treatment:genotype:year
, , year = 2018
```

```
  genotype
treatment Barke HOR10151 S42IL-141 S42IL-143 Scarlett
  control 253.2 278.6 266.1 246.5 259.9
  drought 176.6 185.5 193.6 189.3 137.7
```

```
, , year = 2019
```

```
  genotype
treatment Barke HOR10151 S42IL-141 S42IL-143 Scarlett
  control 237.5 231.0 278.8 205.6 235.8
  drought 209.7 193.5 203.8 218.2 266.0
```

```
*****
*****
*****
```

13.Stomatal Conductance (gsw)  
Shapiro-Wilk normality test

data: resgsw  
W = 0.98666, p-value = 0.06565

```
summary(anovagsw)
              Df Sum Sq Mean Sq F value Pr(>F)
treatment    1  2.6433   2.6433 2602.609 < 2e-16 ***
genotype      4  0.1293   0.0323   31.821 < 2e-16 ***
year          1  0.5011   0.5011  493.387 < 2e-16 ***
treatment:genotype 4  0.2125   0.0531   52.310 < 2e-16 ***
```

```

treatment:year          1 0.1705  0.1705  167.865 < 2e-16 ***
genotype:year           4 0.0666  0.0166   16.387 1.5e-11 ***
treatment:genotype:year 4 0.0243  0.0061    5.982 0.000148 ***
Residuals               190 0.1930  0.0010
---
Signif. codes:  0 '***' 0.001 '**' 0.01 '*' 0.05 '.' 0.1
' ' 1
> print(model.tables(anovagsw,"means"),digits=3)
Tables of means
Grand mean

0.1922355

treatment
treatment
control drought
 0.3044  0.0800

genotype
genotype
  Barke  HOR10151  S42IL-141  S42IL-143  Scarlett
 0.1867   0.1701   0.2373   0.1972   0.1699

year
year
 2018  2019
0.2695 0.1613

treatment:genotype
genotype
treatment Barke HOR10151 S42IL-141 S42IL-143 Scarlett
control 0.323 0.300 0.376 0.251 0.272
drought 0.050 0.040 0.099 0.143 0.068

treatment:year
year
treatment 2018 2019
control 0.427 0.256
drought 0.112 0.067

genotype:year
year
genotype 2018 2019
Barke 0.2781 0.1501
HOR10151 0.2798 0.1262
S42IL-141 0.2643 0.2265
S42IL-143 0.2856 0.1619
Scarlett 0.2395 0.1421

treatment:genotype:year
, , year = 2018

genotype
treatment Barke HOR10151 S42IL-141 S42IL-143 Scarlett

```

```

control 0.451 0.482    0.426    0.395    0.380
drought 0.105 0.078    0.103    0.177    0.099

```

```
, , year = 2019
```

```

          genotype
treatment Barke HOR10151 S42IL-141 S42IL-143 Scarlett
  control 0.271 0.227    0.356    0.194    0.229
  drought 0.029 0.025    0.097    0.130    0.055

```

```

*****
*****
*****

```

14. Vapour pressure deficit of the leaf (VPDleaf)  
Shapiro-Wilk normality test

```

data: resVPDleaf
W = 0.97926, p-value = 0.5789

```

```
summary(anovaVPDleaf)
```

|                         | Df  | Sum Sq | Mean Sq | F value  | Pr(>F)   |     |
|-------------------------|-----|--------|---------|----------|----------|-----|
| treatment               | 1   | 2.361  | 2.361   | 296.297  | < 2e-16  | *** |
| genotype                | 4   | 0.331  | 0.083   | 10.399   | 1.23e-07 | *** |
| year                    | 1   | 20.048 | 20.048  | 2516.302 | < 2e-16  | *** |
| treatment:genotype      | 4   | 1.380  | 0.345   | 43.293   | < 2e-16  | *** |
| treatment:year          | 1   | 8.627  | 8.627   | 1082.828 | < 2e-16  | *** |
| genotype:year           | 4   | 2.450  | 0.613   | 76.890   | < 2e-16  | *** |
| treatment:genotype:year | 4   | 0.277  | 0.069   | 8.684    | 1.85e-06 | *** |
| Residuals               | 190 | 1.514  | 0.008   |          |          |     |

```
---
```

```
Signif. codes:  0 '***' 0.001 '**' 0.01 '*' 0.05 '.' 0.1 ' ' 1
```

```
> print(model.tables(anovaVPDleaf, "means"), digits=3)
```

```
Tables of means
Grand mean
```

```
2.273983
```

```

treatment
treatment
control drought
  2.168    2.380

```

```

genotype
genotype
  Barke  HOR10151 S42IL-141 S42IL-143  Scarlett
  2.279    2.226    2.231    2.315    2.319

```

```

year
year
2018 2019
2.763 2.079

```

```
treatment:genotype
```

```

      genotype
treatment Barke HOR10151 S42IL-141 S42IL-143 Scarlett
  control 2.051 2.223      2.063      2.252      2.251
  drought 2.508 2.228      2.399      2.378      2.386

```

```

treatment:year
  year
treatment 2018 2019
  control 2.34 2.10
  drought 3.19 2.06

```

```

genotype:year
  year
genotype 2018 2019
  Barke    2.967 2.004
  HOR10151 2.487 2.121
  S42IL-141 2.883 1.970
  S42IL-143 2.639 2.185
  Scarlett 2.836 2.112

```

```

treatment:genotype:year
, , year = 2018

```

```

      genotype
treatment Barke HOR10151 S42IL-141 S42IL-143 Scarlett
  control 2.48 2.23      2.37      2.21      2.38
  drought 3.45 2.74      3.40      3.06      3.29

```

```

, , year = 2019

```

```

      genotype
treatment Barke HOR10151 S42IL-141 S42IL-143 Scarlett
  control 1.88 2.22      1.94      2.27      2.20
  drought 2.13 2.02      2.00      2.10      2.02

```

```

*****
*****
*****

```

### 15. Electron transport rate (ETR)

Shapiro-Wilk normality test

```

data: resETR
W = 0.99375, p-value = 0.6416

```

```

summary(anovaETR)

```

|                         | Df | Sum Sq | Mean Sq | F value | Pr(>F)   |     |
|-------------------------|----|--------|---------|---------|----------|-----|
| treatment               | 1  | 15474  | 15474   | 79.17   | 4.48e-16 | *** |
| genotype                | 4  | 72095  | 18024   | 92.21   | < 2e-16  | *** |
| year                    | 1  | 17597  | 17597   | 90.03   | < 2e-16  | *** |
| treatment:genotype      | 4  | 10735  | 2684    | 13.73   | 7.45e-10 | *** |
| treatment:year          | 1  | 45914  | 45914   | 234.91  | < 2e-16  | *** |
| genotype:year           | 4  | 14212  | 3553    | 18.18   | 1.17e-12 | *** |
| treatment:genotype:year | 4  | 16105  | 4026    | 20.60   | 4.08e-14 | *** |

```

Residuals          190  37137    195
---
Signif. codes:  0 '***' 0.001 '**' 0.01 '*' 0.05 '.' 0.1
' ' 1
> print(model.tables(anovaETR,"means"),digits=3)
Tables of means
Grand mean

116.2573

treatment
treatment
control drought
  124.8  107.7

genotype
genotype
  Barke  HOR10151  S42IL-141  S42IL-143  Scarlett
    99.4    100.5    114.4    150.6    116.4

year
year
2018  2019
130.7 110.5

treatment:genotype
  genotype
treatment Barke HOR10151 S42IL-141 S42IL-143 Scarlett
control 107.8 121.2 119.8 149.4 126.0
drought 90.9 79.7 109.0 151.8 106.9

treatment:year
  year
treatment 2018 2019
control 162.7 109.7
drought 98.8 111.2

genotype:year
  year
genotype 2018 2019
Barke 138.8 83.6
HOR10151 114.8 94.8
S42IL-141 118.7 112.7
S42IL-143 160.2 146.7
Scarlett 121.2 114.6

treatment:genotype:year
, , year = 2018

  genotype
treatment Barke HOR10151 S42IL-141 S42IL-143 Scarlett
control 190.3 154.5 147.6 189.3 131.7
drought 87.3 75.0 89.9 131.1 110.7

```

```
, , year = 2019
```

```

      genotype
treatment Barke HOR10151 S42IL-141 S42IL-143 Scarlett
  control  74.8 107.9    108.7    133.4    123.7
  drought  92.4  81.6    116.7    160.1    105.4
*****
*****
*****

```

16. Intrinsic water use efficiency (iWUE)

Shapiro-Wilk normality test

```

data: resiWUE
W = 0.98835, p-value = 0.06955

```

```
summary(anovaiWUE)
```

|                         | Df  | Sum Sq | Mean Sq | F value | Pr(>F)       |
|-------------------------|-----|--------|---------|---------|--------------|
| treatment               | 1   | 41755  | 41755   | 404.786 | < 2e-16 ***  |
| genotype                | 4   | 10817  | 2704    | 26.215  | < 2e-16 ***  |
| year                    | 1   | 34     | 34      | 0.333   | 0.564        |
| treatment:genotype      | 4   | 17540  | 4385    | 42.508  | < 2e-16 ***  |
| treatment:year          | 1   | 10108  | 10108   | 97.987  | < 2e-16 ***  |
| genotype:year           | 4   | 3953   | 988     | 9.581   | 4.45e-07 *** |
| treatment:genotype:year | 4   | 4714   | 1179    | 11.425  | 2.49e-08 *** |
| Residuals               | 190 | 19599  | 103     |         |              |

```

---
Signif. codes:  0 '***' 0.001 '**' 0.01 '*' 0.05 '.' 0.1
' ' 1

```

```
> print(model.tables(anovaiWUE,"means"),digits=3)
```

```

Tables of means
Grand mean

```

94.01245

```

  treatment
treatment
control drought
  79.9    108.1

```

```

  genotype
genotype
  Barke  HOR10151  S42IL-141  S42IL-143  Scarlett
  97.0    101.0    86.5    101.1    84.4

```

```

  year
year
2018 2019
93.4 94.3

```

```

  treatment:genotype
  genotype
treatment Barke HOR10151 S42IL-141 S42IL-143 Scarlett

```

|         |       |       |       |       |      |
|---------|-------|-------|-------|-------|------|
| control | 80.2  | 80.0  | 60.8  | 97.2  | 81.4 |
| drought | 113.9 | 122.0 | 112.3 | 105.1 | 87.3 |

```
treatment:year
  year
treatment 2018 2019
  control  68.3 84.6
  drought 118.4 104.0
```

```
genotype:year
  year
genotype 2018 2019
  Barke   96.4 97.3
  HOR10151 90.5 105.2
  S42IL-141 89.8 85.2
  S42IL-143 96.3 103.1
  Scarlett 93.9 80.5
```

```
treatment:genotype:year
, , year = 2018
```

```
  genotype
treatment Barke HOR10151 S42IL-141 S42IL-143 Scarlett
  control  71.4  57.8     65.2     77.5     69.6
  drought 121.4 123.1    114.3    115.1    118.3
```

```
, , year = 2019
```

```
  genotype
treatment Barke HOR10151 S42IL-141 S42IL-143 Scarlett
  control  83.7  88.9     59.0     105.0    86.1
  drought 110.9 121.5    111.5    101.1    74.9
```
